# Supplementary material for: An experimental study of the effect of water and chlorine on plagioclase nucleation and growth in mafic magmas: application to mafic pegmatites
Source: Copernicus journal article supplement (doi:10.5194/ejm-35-1111-2023), 2023-12-13
Supplement: Supplementary file 1 [file ejm-35-1111-2023-supplement.zip]

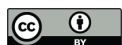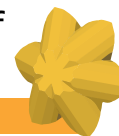

*Supplement of*

**An experimental study of the effect of water and chlorine on plagioclase nucleation and growth in mafic magmas: application to mafic pegmatites**

**Paul Heckmann et al.**

*Correspondence to:* Paul Heckmann ([paul.heckmann@uit.no](mailto:paul.heckmann@uit.no))

- [ejm-35-1111-2023-supplement-title-page.pdf](#)
- [Figure S1.png](#)
- [S1 Figure Caption.txt](#)
- [Supplementary\\_tables\\_revised.xlsx](#)

The copyright of individual parts of the supplement might differ from the article licence.
