# Supplementary material for: An experimental study of the effect of water and chlorine on plagioclase nucleation and growth in mafic magmas: application to mafic pegmatites
Source: Copernicus journal article supplement (doi:10.5194/ejm-35-1111-2023), 2023-12-13
Supplement: Supplementary file 2 [file ejm-35-1111-2023-supplement.zip]

Archive with 4 entries (4 files):
- Figure S1.png
- Supplementary_tables_revised.xlsx
- ejm-35-1111-2023-supplement-title-page.pdf
- S1 Figure Caption.txt
