# Supplementary material for: An experimental study of the effect of water and chlorine on plagioclase nucleation and growth in mafic magmas: application to mafic pegmatites
Source: Copernicus journal article supplement (doi:10.5194/ejm-35-1111-2023), 2023-12-13
Supplement: Supplementary file 2 [file ejm-35-1111-2023-supplement.zip › S1 Figure Caption.txt]

Figure S1: Mass balance estimation of Fe-loss of equilibrium and dynamic experiments by time. First number in square brackets represents H2O in wt. %, second number in square brackets represents Cl in wt. %). gl = glass, pl = plagioclase, cpx = clinopyroxene, ol = olivine. Round brackets represent mass balance estimation of each phase. Red marker and label correspond to equilibrium experiments, whereas blue label correspond to dynamic experiments. 
