# Supplementary material for: An experimental study of the effect of water and chlorine on plagioclase nucleation and growth in mafic magmas: application to mafic pegmatites
Source: Copernicus journal article supplement (doi:10.5194/ejm-35-1111-2023), 2023-12-13
Supplement: Supplementary file 2 [file ejm-35-1111-2023-supplement.zip › Supplementary_tables_revised.xlsx]

## Sheet: README
	Supplementary tables
	An experimental study of the effect of water and chlorine on plagioclase nucleation and growth in mafic magmas: application to mafic pegmatites
	Paul Heckmann, Giada Iacono-Marziano, Sabina Strmic Palinkas
	This file contains the following supplementary tables:
	Standards and detection limits
	MELTS FMQ-2
	MELTS liquidus temperatures
	MELTS Fe-loss
	The additional tables contain the electron-probe micro-analyser data.
	Each of the numbered spreadsheets (21-55) contains the data of the analysis of one experiment.
	The experimental conditions are listed in the spreadshit "Sample references".
	The speadsheet "Starting glass" gives contains the analysis of the starting material.
	b.dl = below detection limit.
	n.d. = no data
	Oxides in wt% and detection limit in ppm.
	plg = plagioclase
	cpx = clinopyroxene
	ol = olivine

## Sheet: Standards and detection limits
Table S1: Electron microprobe standards and detection limits in µg/g.
Element	Standard	Detection limit
Si	Albite	760
Ti	TiMnO3	1230
Al	Al2O3	640
Fe	Fe2O3	2000
Mn	TiMnO3	1740
Mg	MgO	340
Ca	Andradite	640
Na	Albite	570
K	Orthoclase	900
P	Apatite	1330
Cl	Vanadinite	480
Fe	Topaz	4930

## Sheet: MELTS liquidus temperatures
Table S2: MELTS liquidus temperatures
H2O (wt%)	Cl (wt%)	Liquidus temperature in C
0	0	1276.15
0.25	0	1260.52
1	0	1218.14
2	0	1171.88
1	0.35	1212.7
1	1	1203.1

## Sheet: MELTS Fe-loss
Table S3: Effect of Fe-loss on phase equilibra
H2O loaded (wt%)	Cl loaded (wt%)	Experiment	MELTS FMQ	Difference Experiment and MELTS FMQ	MELTS FQM with fe-loss	Difference MELTS and MELTS Fe-loss (FMQ)	MELTS FQM-2	MELTS FQM-2 with fe-loss	Difference MELTS and MELTS Fe-loss (FMQ -2)
0	0	glass (68) pl (27) cpx (4) ol (1)	glass (5) plag (63) cpx (32)	glass (-63) pl (+36) cpx (+28) ol (-1)	glass (6) plag (65) cpx (29)	glass (+1) plag (+2) cpx (-3)	glass(8) plag (62) cpx (30)	glass (5) plag (66) cpx (30)	glass (-3) plag (+4)
1	0	glass (95) pl (5)	glass (68) plag (25) cpx (10)	glass (-27) pl (+20) cpx (+10)	glass (66) plag (26) cpx (9)	glass (-2) plag (+1) cpx (-1)	glass (70) plag (26) ol (3)	glass (66) plag (27) cpx (5) ol (2)	glass (-4) plag (+1) cpx (+5) ol (-1)
2	0	glass (96) pl (4)	glass (93) plag (7)	glass (-6) pl (+3)	glass (92) plag (8)	glass (-1) plag (+1)	below liquidus	glass (92) plag (8)	glass (-8) plag (+8)
1	0.35	glass (95) pl (5)	glass (74) plag (22) cpx (4)	glass (-21) pl (+17) cpx (4)	glass (70) plag (24) cpx (5) ol (1)	glass (-4) plag (+2) cpx (+1) ol (+1)	glass (74) plag (23) ol (2)	glass (72) plag (26) ol (2)	glass (-2) plag (+3)
1	1	glass (97) pl (3)	glass (81) plag (19)	glass (-16) pl (+16)	glass (80) plag (20) cpx (1)	glass (-1) plag (+1) cpx (+1)	glass (80) plag (19) ol (1)	glass (79) plag (20) ol (1)	glass (-1) plag (+1) ol (1)
Numbers in parenthesis are abundances of phases or differences of the abundances (with plus and minus sign) in wt.%

## Sheet: MELTS FMQ-2
Table S4: Results of MELTS modeling (in wt%) FQM -2.
wt% H2O	0	0.25	1	1	1		0	0.25	1	1	1		0	0		1	1	1
wt% Cl	0	0	0	1	0.4		0	0	0	1	0.4		0	0		0	1	0.4
phase	glass						pl						cpx1	cpx2		ol	ol	ol
abundance	7.6	31.2	70.39	80.0935	74.2568		62.1	47.6	26.2	18.9678	23.3427		19	11.4		3.3987	0.9384	2.3985
SiO2	47.2	53.7	53.9	51.5697	52.8968		54.6	52.4	49.6	49.3105	49.4858		51	49.8		39.0455	39.3967	39.1952
TiO2	3.7	1.3	0.7	0.5823	0.6372		-	-	-	-	-		0.4	1.1		-	-	-
Al2O3	13.6	15.8	16.5	16.7737	16.5987		28.9	30.4	32.3	32.5208	32.4013		3.9	5.2		-	-	-
FeOtot	17.7	10.5	7.7	7.2328	7.5389		-	-	-	-	-		18.3	11.7		19.2833	17.4224	18.4905
MgO	4.2	4.4	5.8	6.2122	5.9923		-	-	-	-	-		18.9	14.6		41.2959	42.8251	41.9479
CaO	8	7.8	9.6	9.4162	9.4953		11.1	12.9	15.1	15.324	15.1846		7.3	17.2		0.3753	0.3559	0.3664
Na2O	3.9	4.7	3.8	3.5464	3.7017		5	4.2	2.9	2.8082	2.8855		0.2	0.3		-	-	-
K2O	1.4	0.9	0.5	0.4186	0.4541		0.4	0.1	0.0482	0.0364	0.0429		-	-		-	-	-
Cl2O	-	-	-	2.9907	1.3091		-	-	-	-	-		-	-		-	-	-
P2O5	0.4	0.1	0.0427	0.0366	0.0401		-	-	-	-	-		-	-		-	-	-
H2O	-	0.8	1.4	1.2207	1.3359		-	-	-	-	-		-	-		-	-	-
Mg#	-	-	-	-	-		-	-	-	-	-		64.7939	68.9796		79.2368	81.4134	80.1692
An	-	-	-	-	-		0.54	0.63	0.74				-	-		-	-	-
Total	100.1	100	99.9427	99.9999	100		100	100	99.9482	99.9999			100	99.9		100	100	100
FQM-2, 1150 °C, 300 MPa, pl = plagioclase, cpx = clinopyroxene

## Sheet: Sample references
Sample	Capsule	Exp. Type	Duration (minutes)	H2O loaded (wt%)	Cl loaded (wt%)
PEG_46	AuPd	Equilibrium	1800	0	0
PEG_36	AuPd	Dynamic	100	0	0
PEG_21	Pt	Dynamic	250	0	0
PEG_41	AuPd	Dynamic	1800	0	0
PEG_52	AuPd	Equilibrium	1800	1	0
PEG_37	AuPd	Dynamic	100	1	0
PEG_22	Pt	Dynamic	250	0.99	0
PEG_42	AuPd	Dynamic	1800	1	0
PEG_48	AuPd	Equilibrium	1800	2	0
PEG_40	AuPd	Dynamic	100	1.99	0
PEG_25	Pt	Dynamic	250	1.94	0
PEG_45	AuPd	Dynamic	1800	1.96	0
PEG_55	AuPd	Equilibrium	1800	1	0.35
PEG_39	AuPd	Dynamic	100	1	0.4
PEG_24	Pt	Dynamic	250	1	0.4
PEG_44	AuPd	Dynamic	1800	0.96	0.41
PEG_54	AuPd	Equilibrium	1800	0.8	1
PEG_38	AuPd	Dynamic	100	1	0.99
PEG_23	Pt	Dynamic	250	1	0.99
PEG_43	AuPd	Dynamic	1800	0.94	1.04

## Sheet: Starting glass
Analysis	Comment	Na2O	MgO	SiO2	Al2O3	CaO	K2O	TiO2	FeO	MnO	Cl	P2O5	Total	Na_dl	Mg_dl	Si_dl	Al_dl	Ca_dl	K_dl	Ti_dl	Fe_dl	Mn_dl	Cl_dl	P_dl
14 / 1 .	glass	3.45122	5.99089	50.2526	18.9825	10.8379	0.36668	0.47528	5.87614	<dl	<dl	<dl	96.3581	632	366	821	650	560	685	1350	1886	1794	n.d.	524
15 / 1 .	glass	3.50864	5.87153	50.0857	19.0625	10.9114	0.34383	0.53624	5.67192	<dl	<dl	<dl	96.1791	595	403	733	635	614	885	1152	1729	1595	326	677
36 / 1 .	glass	3.59143	5.7658	51.4652	20.1278	10.633	0.39226	0.53187	6.59593	<dl	<dl	<dl	99.2233	566	382	807	737	650	1046	1094	2006	1591	n.d.	677
37 / 1 .	glass	3.50294	5.96414	50.5367	20.3244	10.7467	0.33242	0.51437	6.26372	<dl	<dl	<dl	98.371	673	350	864	718	620	1104	1346	2267	1591	n.d.	720
38 / 1 .	glass	3.51196	5.91232	50.7868	20.2992	10.7668	0.38885	0.49809	6.3151	<dl	<dl	<dl	98.6623	565	385	795	686	610	884	1413	2140	1591	n.d.	n.d.
54 / 1 .	glass	3.45177	5.67984	51.9273	20.0767	10.9627	0.38995	0.45454	6.18795	0.0215	<dl	0.06904	99.2354	644	357	817	637	568	444	587	2030	1624	324	528
55 / 1 .	glass	3.4504	5.665	52.1287	20.0073	10.7034	0.37422	0.50011	6.13914	0.10755	<dl	0.06541	99.1596	566	372	798	670	601	393	533	2031	1922	325	394
56 / 1 .	glass	3.35747	5.66501	51.3484	20.436	10.8365	0.40088	0.44891	6.65572	0.10414	<dl	0.07026	99.3232	647	361	754	733	710	467	604	1459	1623	n.d.	466
57 / 1 .	glass	3.28666	5.83858	52.1862	20.1446	10.9202	0.35866	0.51898	6.42927	0.0893	<dl	<dl	99.7774	590	317	781	654	603	444	501	2166	1511	n.d.	635
58 / 1 .	glass	3.6255	5.73107	51.5271	20.1013	10.8377	0.37599	0.46441	6.24845	0.12564	<dl	<dl	99.0798	551	338	814	723	603	476	540	1884	1827	475	466

## Sheet: 21
Analysis	Comment	Na2O	MgO	SiO2	Al2O3	CaO	K2O	TiO2	FeO	MnO	Cl	P2O5	Total	Na_dl	Mg_dl	Si_dl	Al_dl	Ca_dl	K_dl	Ti_dl	Fe_dl	Mn_dl	Cl_dl	P_dl
41 / 1 .	glass	3.43056	7.07198	50.4067	16.8903	9.09438	0.53455	0.58946	6.40619	b.dl	b.dl	b.dl	94.6017	680	357	843	677	581	986	1454	1343	2134	355	463
42 / 1 .	glass	3.57075	6.74645	51.6044	16.693	8.89804	0.54287	0.61788	7.18476	b.dl	b.dl	b.dl	95.9923	671	345	800	649	575	1048	1387	1706	2284	n.d.	581
43 / 1 .	glass	3.53355	7.02184	51.048	16.703	8.98649	0.63652	0.72292	7.83639	b.dl	b.dl	b.dl	96.5736	618	325	802	680	599	884	1407	1704	1786	382	762
44 / 1 .	glass	3.74012	6.87248	51.2009	16.4286	8.96166	0.61105	0.80239	7.07619	b.dl	b.dl	b.dl	95.7658	629	406	879	695	589	885	1224	2073	2132	n.d.	580
45 / 1 .	glass	3.57184	6.95445	50.9078	16.9282	8.87752	0.57526	0.6596	7.05077	b.dl	b.dl	b.dl	95.7609	621	384	873	633	573	885	1342	2138	1967	n.d.	580
194 / 1 .	glass	3.81103	6.83684	52.916	16.9428	8.97281	0.63045	0.87528	5.97357	b.dl	b.dl	b.dl	97.197	649	333	779	632	515	787	1157	2232	1568	390	625
195 / 1 .	glass	3.63681	7.00111	51.849	16.6647	8.86179	0.60602	0.81819	6.86761	b.dl	b.dl	b.dl	96.5267	561	340	777	655	572	751	1199	2000	1565	378	426
196 / 1 .	glass	3.50595	6.88059	51.8174	16.2629	8.96963	0.52243	0.73608	7.19536	b.dl	b.dl	b.dl	96.1007	663	364	773	665	555	851	1060	1874	1739	n.d.	664
197 / 1 .	glass	3.35121	7.21689	52.2932	16.9735	9.67472	0.44453	0.63521	6.154	b.dl	b.dl	b.dl	96.8791	640	395	773	663	563	997	1477	2390	1902	421	581
198 / 1 .	glass	3.35464	7.71386	52.9801	17.2592	10.0255	0.50816	0.6119	4.47105	b.dl	b.dl	b.dl	97.0517	641	294	772	640	581	716	1312	1440	1748	379	536
199 / 1 .	glass	3.42988	6.87698	51.9675	16.4736	8.94724	0.57952	0.59889	7.82704	b.dl	b.dl	b.dl	96.8581	655	336	721	582	571	675	1398	2172	2042	450	534
200 / 1 .	glass	3.62946	6.67708	51.8494	16.3225	9.05012	0.51851	0.70259	7.65205	b.dl	b.dl	b.dl	96.6727	523	354	832	676	552	1022	1380	1346	1468	431	426
201 / 1 .	glass	3.46912	6.74088	51.1195	16.3316	8.96427	0.59857	0.69768	7.77616	b.dl	b.dl	b.dl	95.8605	612	384	796	652	534	940	1302	2058	1818	n.d.	482
202 / 1 .	glass	3.66497	6.6325	52.38	16.3749	8.71289	0.63594	0.68309	7.03978	b.dl	b.dl	b.dl	96.2712	569	372	776	703	574	942	1474	2000	1740	n.d.	581
172 / 1 .	plg	3.85288	0.29135	51.8021	28.2895	12.7959	0.09251	b.dl	2.18667	b.dl	b.dl	b.dl	99.4584	638	341	735	766	667	395	523	1654	1524	370	731
173 / 1 .	plg	3.91951	0.31547	51.9097	27.58	12.8639	0.08062	b.dl	1.79356	b.dl	b.dl	b.dl	98.4691	684	368	841	744	623	446	581	1973	n.d.	499	588
174 / 1 .	plg	3.65057	0.3088	51.3958	27.7309	13.1595	0.12203	b.dl	1.56676	b.dl	b.dl	b.dl	97.9779	616	326	752	742	648	450	545	1740	n.d.	356	n.d.
175 / 1 .	plg	3.88054	0.34591	51.8004	27.7026	12.5773	0.1036	b.dl	1.85707	b.dl	b.dl	b.dl	98.4658	636	343	794	665	628	446	531	1739	1402	421	396
176 / 1 .	plg	3.81977	0.3603	52.2672	27.8051	12.8649	0.09863	b.dl	1.70785	b.dl	b.dl	b.dl	99.048	641	326	784	711	662	441	529	2431	1843	n.d.	532
209 / 1 .	plg	3.97557	0.32555	51.4882	28.0139	12.649	0.1312	0.17882	1.534	b.dl	b.dl	b.dl	98.3032	642	335	775	734	643	799	1039	1377	n.d.	n.d.	492
210 / 1 .	plg	4.1958	0.30147	52.6124	27.696	12.1704	b.dl	b.dl	1.48004	b.dl	b.dl	b.dl	98.6067	635	317	770	696	582	835	n.d.	2043	1782	322	545
211 / 1 .	plg	3.96626	0.29891	51.3206	28.5016	12.8703	0.12624	b.dl	1.61052	b.dl	b.dl	b.dl	98.8067	653	349	749	725	634	726	1140	1376	1864	n.d.	544
212 / 1 .	plg	3.89462	0.28823	51.3495	28.4367	13.0137	b.dl	b.dl	1.7335	b.dl	b.dl	b.dl	98.8917	572	320	801	696	619	927	1039	1549	n.d.	321	n.d.
213 / 1 .	plg	3.89135	0.36787	51.8092	27.9252	12.4382	b.dl	b.dl	1.73812	b.dl	b.dl	b.dl	98.319	620	329	744	796	626	958	1234	1705	n.d.	n.d.	n.d.
214 / 1 .	plg	4.13674	0.30468	51.8742	28.6062	12.6686	0.09874	b.dl	1.53525	b.dl	b.dl	b.dl	99.2419	668	314	732	792	639	726	1211	1281	n.d.	459	n.d.
215 / 1 .	plg	3.8005	0.24818	51.7029	28.5878	12.9929	b.dl	b.dl	1.20747	b.dl	b.dl	b.dl	98.849	641	362	724	763	600	833	1013	1705	1402	n.d.	544
46 / 1 .	cpx	0.38417	20.3938	50.2912	4.22278	16.0545	b.dl	0.28269	7.64585	0.19437	b.dl	b.dl	99.4993	543	415	766	581	702	973	1349	1534	1362	449	n.d.
47 / 1 .	cpx	0.46936	17.1896	48.8218	5.49585	19.2052	b.dl	0.52114	7.69102	b.dl	b.dl	b.dl	99.4861	483	401	827	578	713	n.d.	1177	2065	1358	348	n.d.
48 / 1 .	cpx	0.33927	19.8397	49.0669	5.68676	15.9453	b.dl	0.50153	7.78045	0.26024	b.dl	b.dl	99.4514	543	368	755	660	685	939	1065	2068	1786	414	n.d.
49 / 1 .	cpx	0.41293	17.0085	48.4316	5.68337	18.5838	b.dl	0.476	8.22396	b.dl	b.dl	b.dl	98.9142	535	434	797	552	720	796	1232	2073	1591	376	n.d.
50 / 1 .	cpx	0.48673	18.9305	49.2745	6.01628	16.5293	b.dl	0.52325	7.41319	b.dl	b.dl	b.dl	99.338	415	389	802	603	622	798	1227	2377	1965	n.d.	n.d.
51 / 1 .	cpx	0.38607	16.7769	48.077	5.6271	19.8933	b.dl	0.46334	6.97272	b.dl	b.dl	b.dl	98.2371	502	392	840	626	756	866	1354	2325	2055	n.d.	n.d.
52 / 1 .	cpx	0.32648	17.8432	50.9894	5.21377	19.5617	b.dl	0.56542	3.93573	b.dl	b.dl	b.dl	98.6029	507	366	761	621	690	759	1241	2147	1893	364	453
53 / 1 .	cpx	0.44804	18.1328	49.6169	5.13338	19.0624	b.dl	0.37546	6.34909	b.dl	b.dl	b.dl	99.2609	458	349	855	503	714	n.d.	1308	1535	1593	n.d.	n.d.
203 / 1 .	cpx	0.40727	17.067	49.2464	5.19742	18.9103	b.dl	0.40414	7.32254	b.dl	b.dl	b.dl	98.8207	578	385	764	577	698	n.d.	1180	1901	1768	365	478
204 / 1 .	cpx	0.40328	17.6236	50.999	4.80279	19.2681	b.dl	0.52832	6.33847	0.23176	b.dl	b.dl	100.22	513	387	764	576	695	n.d.	892	1969	1594	399	619
205 / 1 .	cpx	0.46608	16.2871	47.9331	5.87166	18.5804	b.dl	0.58319	8.90511	0.19579	b.dl	b.dl	98.8229	564	381	748	565	736	n.d.	1055	2024	1387	448	n.d.
206 / 1 .	cpx	0.34758	19.7716	49.3661	6.63638	15.2295	b.dl	0.57911	7.22561	b.dl	b.dl	b.dl	99.355	461	342	774	596	691	753	1310	1620	2150	n.d.	n.d.
207 / 1 .	cpx	0.34301	20.111	50.843	4.9605	15.6487	b.dl	b.dl	6.96728	b.dl	b.dl	b.dl	99.1523	501	380	844	475	650	855	1431	2033	1593	n.d.	n.d.
208 / 1 .	cpx	0.45086	17.1418	49.392	5.51819	19.1575	b.dl	0.44694	6.72799	b.dl	b.dl	b.dl	98.9923	419	394	767	536	687	n.d.	1293	1767	1496	n.d.	n.d.
54 / 1 .	ol	b.dl	49.9607	40.031	b.dl	0.29667	b.dl	b.dl	10.0404	b.dl	b.dl	b.dl	100.589	n.d.	443	682	n.d.	394	900	898	1624	1963	n.d.	n.d.
55 / 1 .	ol	b.dl	49.9036	39.9092	b.dl	0.24809	b.dl	b.dl	9.74465	b.dl	b.dl	b.dl	99.9509	n.d.	433	811	572	454	n.d.	n.d.	1864	1877	n.d.	590
56 / 1 .	ol	b.dl	50.6206	39.662	b.dl	0.27548	b.dl	b.dl	9.70595	b.dl	b.dl	b.dl	100.786	457	409	756	541	439	783	1132	1933	1961	n.d.	532
57 / 1 .	ol	b.dl	50.8059	39.91	b.dl	0.2717	b.dl	b.dl	9.9619	b.dl	b.dl	b.dl	101.343	449	425	821	498	421	n.d.	1134	2075	1586	401	397
58 / 1 .	ol	b.dl	50.0372	40.9143	0.53133	0.5286	b.dl	b.dl	9.03381	0.31153	b.dl	b.dl	101.506	463	415	821	643	417	899	n.d.	2441	1585	n.d.	470

## Sheet: 22
Analysis	Comment	CaO	Na2O	MgO	SiO2	Al2O3	K2O	TiO2	FeO	MnO	Total	P_dl	Ca_dl	Na_dl	Mg_dl	Si_dl	Al_dl	K_dl	Ti_dl	Fe_dl	Mn_dl
148 / 1 .	glass	10.3909	3.35771	6.0425	51.4208	19.0692	0.35855	0.47649	5.01659	b.dl	96.2458	530	610	651	351	825	659	468	547	1730	2014
149 / 1 .	glass	10.1755	3.39347	6.04717	52.223	18.4458	0.432	0.57123	4.84608	b.dl	96.1951	395	583	603	328	787	647	410	513	2103	n.d.
150 / 1 .	glass	10.3107	3.37085	5.91078	51.8926	19.1463	0.41713	0.57254	5.22219	b.dl	96.8493	585	567	576	370	772	750	440	502	2102	n.d.
151 / 1 .	glass	9.98888	3.50575	5.83935	52.1893	18.7385	0.46735	0.45373	5.12544	b.dl	96.4447	638	536	598	394	725	741	430	537	1557	1732
152 / 1 .	glass	9.91987	3.49917	6.05451	52.9227	18.4003	0.45853	0.49664	4.79006	b.dl	96.6863	638	573	609	341	736	740	415	578	1557	2101
153 / 1 .	glass	10.0836	3.40764	5.95388	51.5065	19.2647	0.42276	0.45655	4.78374	b.dl	95.9252	586	581	536	357	765	613	435	549	1888	2014
154 / 1 .	glass	10.0847	3.42531	6.1573	51.1871	18.3575	0.47763	0.49028	5.44371	b.dl	95.6728	636	619	570	352	821	677	425	528	1644	1829
155 / 1 .	glass	10.4384	3.25694	6.24625	51.3374	18.4094	0.46602	0.53108	5.35688	b.dl	96.2091	529	580	607	308	756	698	439	554	2033	1731
156 / 1 .	glass	10.083	3.42087	6.20441	52.105	18.4173	0.45369	0.53659	5.08939	0.19868	96.5546	467	583	561	329	827	665	440	515	2032	1392
157 / 1 .	glass	9.90826	3.54215	5.95259	51.6479	18.5704	0.40915	0.46912	5.31735	b.dl	95.9367	530	625	632	371	859	697	454	585	1251	2098
158 / 1 .	glass	10.0297	3.57902	6.22714	51.588	18.6288	0.4356	0.50138	5.74612	b.dl	96.92	684	585	483	347	782	694	420	515	1251	1512
159 / 1 .	glass	10.1698	3.38553	6.33722	51.0872	17.5464	0.42975	0.52108	5.99593	b.dl	95.7013	466	595	631	360	847	635	424	535	2030	1511
160 / 1 .	glass	10.0179	3.45177	6.52577	51.5326	17.8909	0.43065	0.52415	5.75955	b.dl	96.3266	585	577	635	347	858	663	435	560	2100	1729
185 / 1 .	plg	14.3861	3.01283	0.23665	48.7299	29.2517	b.dl	b.dl	0.54208	b.dl	96.2978	530	674	606	354	756	772	405	495	1472	n.d.
186 / 1 .	plg	14.5103	2.93753	0.2506	48.0439	29.3213	b.dl	b.dl	0.68538	b.dl	95.9195	585	681	658	313	795	620	435	559	1822	1746
187 / 1 .	plg	14.6111	3.03715	0.21273	47.9174	29.7983	0.04696	b.dl	0.41371	b.dl	96.0449	n.d.	633	655	329	736	763	377	547	1567	n.d.
188 / 1 .	plg	13.8421	2.97746	0.44009	47.688	28.7583	0.0519	b.dl	0.909	b.dl	94.7455	n.d.	660	567	336	852	727	410	525	1369	1845
189 / 1 .	plg	14.0692	3.12889	0.53654	48.0287	28.6586	0.0719	b.dl	0.72547	b.dl	95.2742	530	676	537	349	831	727	394	551	1656	1745

## Sheet: 23
Analysis	Comment	Cl	P2O5	CaO	Na2O	MgO	SiO2	Al2O3	K2O	TiO2	FeO	MnO	Total	Cl_dl	P_dl	Ca_dl	Na_dl	Mg_dl	Si_dl	Al_dl	K_dl	Ti_dl	Fe_dl	Mn_dl
118 / 1 .	glass	1.26957	b.dl	10.4702	3.36084	5.50041	51.342	19.8941	0.38411	0.44566	4.36657	0.26024	97.2937	486	n.d.	584	572	359	754	643	426	565	1557	1733
119 / 1 .	glass	1.30785	b.dl	10.3948	3.29615	5.50583	50.9305	19.5208	0.33212	0.44002	4.21625	b.dl	96.033	454	465	609	585	352	775	653	460	533	1362	n.d.
120 / 1 .	glass	1.25377	b.dl	10.5063	3.28412	5.47043	51.1937	19.7708	0.34092	0.46271	4.27169	b.dl	96.5545	506	741	603	619	339	767	653	451	533	2035	n.d.
121 / 1 .	glass	1.2861	b.dl	10.392	3.24857	5.47925	51.2172	19.2817	0.31216	0.52038	4.35499	b.dl	96.166	475	583	560	653	343	786	685	465	525	2170	1733
122 / 1 .	glass	1.21021	b.dl	10.3274	3.25496	5.4539	51.4973	19.71	0.35265	0.46471	4.63019	b.dl	97.0748	496	465	598	601	400	766	701	451	535	1730	1831
123 / 1 .	glass	1.25526	b.dl	10.3278	3.27392	5.55069	50.8263	19.6051	0.37055	0.49194	4.32874	b.dl	96.1265	454	n.d.	626	646	368	811	659	474	540	2359	1627
124 / 1 .	glass	1.12816	b.dl	10.3535	3.21722	5.58314	50.803	19.5713	0.3784	0.4456	4.04506	b.dl	95.6935	395	465	551	619	322	792	674	446	570	1812	1516
125 / 1 .	glass	1.15472	b.dl	10.3467	3.11105	5.47078	51.0853	19.4126	0.32352	0.47915	4.1475	b.dl	95.6566	465	465	616	619	364	766	668	478	560	2170	1627
126 / 1 .	glass	1.07682	b.dl	10.3421	3.27505	5.59911	50.5293	19.5639	0.34	0.47849	3.78819	b.dl	95.0627	443	n.d.	649	516	335	812	664	451	525	2105	1734
127 / 1 .	glass	1.04408	0.11955	10.3584	3.14653	5.51874	51.0448	19.5999	0.37593	0.40744	3.95094	b.dl	95.7206	496	466	598	598	366	811	704	390	598	2034	1628
128 / 1 .	glass	1.09156	b.dl	10.3687	3.28179	5.54172	51.4408	19.6007	0.34497	0.46461	4.33034	b.dl	96.5158	443	393	619	541	370	860	720	426	527	1963	2264
129 / 1 .	glass	1.07827	b.dl	10.4344	3.11573	5.57024	51.7565	19.3388	0.35605	0.51067	3.91109	b.dl	96.2844	407	528	574	651	342	817	775	400	520	1812	1516
130 / 1 .	glass	1.14285	b.dl	10.4043	3.27966	5.42096	51.161	19.346	0.34962	0.46002	4.42801	b.dl	96.0559	526	635	585	535	371	715	773	465	565	1558	1628
131 / 1 .	glass	1.07432	0.0961	9.93163	3.22458	5.22799	48.7715	18.4601	0.35932	0.44469	3.69117	0.22226	91.5037	544	393	601	563	339	789	535	378	558	1732	1516
132 / 1 .	glass	1.12933	b.dl	10.3064	3.06851	5.59816	51.072	19.4767	0.34572	0.44594	3.99834	b.dl	95.4572	454	682	595	669	366	871	699	431	540	1463	n.d.
133 / 1 .	glass	1.09627	b.dl	10.3361	3.30062	5.44815	51.3994	19.4379	0.37447	0.44752	3.84255	b.dl	95.7372	486	304	595	617	341	723	683	436	533	1889	n.d.
180 / 1 .	plg	<dl	b.dl	14.8045	2.83591	0.18739	49.2822	30.9004	0.0597	b.dl	0.30017	b.dl	98.3888	n.d.	n.d.	693	528	356	830	756	405	549	1656	1527
181 / 1 .	plg	<dl	b.dl	15.2136	2.89748	0.23787	49.5622	30.7178	b.dl	b.dl	0.42983	b.dl	99.2164	n.d.	585	620	529	309	813	790	449	525	1899	1640
182 / 1 .	plg	<dl	b.dl	14.9194	2.60372	0.17708	49.2373	31.2587	0.0502	b.dl	b.dl	b.dl	98.5019	n.d.	n.d.	613	521	378	815	703	410	536	2117	n.d.
183 / 1 .	plg	<dl	b.dl	14.964	2.7585	0.2003	49.2714	30.8901	0.06004	b.dl	0.2689	b.dl	98.4345	275	n.d.	643	630	312	777	797	420	n.d.	1742	n.d.
184 / 1 .	plg	<dl	b.dl	14.7387	2.78939	0.20166	49.0174	30.8038	0.0582	b.dl	0.26147	b.dl	97.9671	355	n.d.	655	598	338	815	761	342	512	1742	1748

[truncated: 17 more sheets: 24, 25, 36, 37, 38, 39, 40, 41, 42, 43, 44, 45, 46, 48, 52, 54, 55]
