# Supplementary figures and images for: An experimental study of the effect of water and chlorine on plagioclase nucleation and growth in mafic magmas: application to mafic pegmatites
Source: Copernicus journal article supplement (doi:10.5194/ejm-35-1111-2023), 2023-12-13

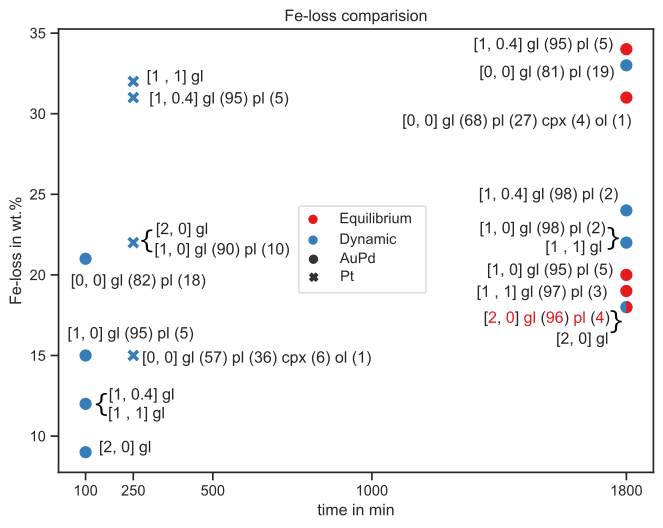

Supplement: Supplementary file 2 [file ejm-35-1111-2023-supplement.zip › Figure S1.png]
